# Supplementary material for: Inflammatory potential of diet scores and the risk of endometrial cancer: A case-control study
Source: Research Square preprint supplement (doi:10.21203/rs.3.rs-6594496/v1), 2025-05-16
Supplement: Supplementary file 1 [file 69365bc0cfe8ab117614fe89.pdf]

## **Supplementary Tables Legends**

**Supplementary Table 1.** Food components included in dietary inflammatory index calculations, inflammatory effect scores, and intake values from the global composite data set reported by Shivappa et al (10).

**Supplementary Table 2.** Food groups included in Empirical Dietary Inflammatory Pattern calculations, and inflammatory effect scores, reported by Tabung et al (11).

**Supplementary Table 3.** Food items included in the Inflammatory Score of the Diet, and mean intake and standard deviation values from the EPIC population reported by Agudo et al (13).

**Supplementary Table 4.** Food groups included in Dietary Inflammation Score calculations, and inflammatory effect scores, reported by Byrd et al (12).

**Supplementary Table 1.** Food components included in dietary inflammatory index calculations, inflammatory effect scores, and intake values from the global composite data set reported by Shivappa et al (10).

| Food parameter               | Overall inflammatory effect score | Global daily mean intake (units/d) | SD    |
|------------------------------|-----------------------------------|------------------------------------|-------|
| Vitamin B <sub>12</sub> (µg) | 0.106                             | 5.15                               | 2.7   |
| Vitamin B <sub>6</sub> (mg)  | -0.365                            | 1.47                               | 0.74  |
| β-Carotene (µg)              | -0.584                            | 3718                               | 1720  |
| Caffeine (g)                 | -0.11                             | 8.05                               | 6.67  |
| Carbohydrate (g)             | 0.097                             | 272.2                              | 40    |
| Cholesterol (mg)             | 0.11                              | 279.4                              | 51.2  |
| Energy (kcal)                | 0.18                              | 2056                               | 338   |
| Total fat (g)                | 0.298                             | 71.4                               | 19.4  |
| Fiber (g)                    | -0.263                            | 18.8                               | 4.9   |
| Folic acid (µg)              | -0.19                             | 273                                | 70.7  |
| Garlic (g)                   | -0.453                            | 2.9                                | 2.9   |
| Fe (mg)                      | -0.319                            | 13.35                              | 3.71  |
| Mg (mg)                      | -0.484                            | 310.1                              | 139.4 |
| MUFA (g) <sup>1</sup>        | 0.032                             | 27                                 | 6.4   |
| Niacin (mg)                  | -0.246                            | 25.9                               | 11.77 |
| n-3 Fatty acids (g)          | -0.159                            | 1.06                               | 1.06  |
| n-6 Fatty acids (g)          | -0.159                            | 10.8                               | 7.5   |
| Onion (g)                    | -0.318                            | 35.9                               | 18.4  |
| Protein (g)                  | -0.021                            | 79.4                               | 13.9  |
| PUFA (g) <sup>2</sup>        | -0.337                            | 13.88                              | 3.76  |
| Riboflavin (mg)              | -0.707                            | 1.7                                | 0.79  |
| Saturated fat (g)            | 0.373                             | 28.6                               | 8     |
| Se (µg)                      | -0.191                            | 67                                 | 25.1  |
| Thiamin (mg)                 | -0.098                            | 1.7                                | 0.66  |
| Vitamin A (RE) <sup>3</sup>  | -0.484                            | 983.9                              | 518.6 |
| Vitamin C (mg)               | -0.731                            | 118.2                              | 43.46 |
| Vitamin D (µg)               | -0.446                            | 6.26                               | 2.21  |
| Vitamin E (mg)               | -0.419                            | 8.73                               | 1.49  |
| Zn (mg)                      | -0.316                            | 9.84                               | 2.19  |
| Green/black tea (g)          | -0.513                            | 1.69                               | 1.53  |
| Flavan-3-ol (mg)             | -0.615                            | 95.8                               | 85.9  |
| Flavones (mg)                | -0.536                            | 1.55                               | 0.07  |
| Flavonols (mg)               | -0.467                            | 17.7                               | 6.79  |
| Flavonones (mg)              | -0.498                            | 41.7                               | 3.82  |
| Anthocyanidins (mg)          | -0.499                            | 18.05                              | 21.14 |
| Isoflavones (mg)             | -0.493                            | 1.2                                | 0.2   |

<sup>1</sup> Monounsaturated fatty acids.

<sup>2</sup> Polyunsaturated fatty acids.

<sup>3</sup> Retinol Equivalents: retinol + 1/6 β-carotene + 1/12 α-carotene.

**Supplementary Table 2.** Food groups included in empirical dietary inflammatory pattern calculations, and inflammatory effect scores, reported by Tabung et al (11).

| <b>Food groups*</b>    | <b>Weight</b> |
|------------------------|---------------|
| Processed meat         | 165.03        |
| Red meat               | 140.19        |
| Organ meat             | 144.61        |
| Other fish             | 252.45        |
| Other vegetables       | 136.14        |
| Refined grains         | 81.21         |
| High-energy beverages  | 156.85        |
| Tomatoes               | 167.92        |
| Tea                    | -42.25        |
| Coffee                 | -83.18        |
| Dark yellow vegetables | -165.37       |
| Leafy green vegetables | -190.29       |
| Snacks                 | -45.08        |
| Fruit juice            | -58.95        |
| Pizza                  | -1175.21      |

\*Components of each food group have been previously described by Tabung et al.

**Supplementary Table 3.** Food items included in the Inflammatory Score of the Diet (ISD), and mean intake and standard deviation values from the EPIC population reported by Agudo et al (13).

| Food items                  | Inflammatory<br>effect score | Daily mean intake | Standard deviation |
|-----------------------------|------------------------------|-------------------|--------------------|
| Energy (kcal)               | 0.180                        | 2063.7            | 430.5              |
| Carbohydrate (g)            | 0.097                        | 221.6             | 48.5               |
| Protein (g)                 | 0.021                        | 81.8              | 18.4               |
| Fiber (g)                   | -0.663                       | 21.0              | 5.32               |
| Saturated fat (g)           | 0.373                        | 32.5              | 10.1               |
| MUFA (g)                    | -0.009                       | 30.9              | 9.37               |
| PUFA (g)                    | -0.337                       | 13.1              | 4.19               |
| Cholesterol (mg)            | 0.110                        | 308.2             | 106.6              |
| Vitamin A (RE) <sup>1</sup> | -0.401                       | 749.4             | 484.9              |
| β-carotene (μg)             | -0.584                       | 2945.0            | 1526.0             |
| Thiamin (mg)                | -0.098                       | 1.29              | 0.373              |
| Riboflavin (mg)             | -0.068                       | 1.71              | 0.43               |
| Vitamin B6 (mg)             | -0.365                       | 1.76              | 0.44               |
| Folic acid (μg)             | -0.190                       | 273.7             | 64.8               |
| Vitamin B12 (μg)            | 0.106                        | 5.93              | 2.58               |
| Vitamin C (mg)              | -0.424                       | 113.5             | 39.7               |
| Vitamin D (μg)              | -0.446                       | 3.86              | 2.06               |
| Vitamin E (mg)              | -0.419                       | 11.5              | 3.85               |
| Fe (mg)                     | 0.032                        | 12.5              | 3.03               |

|                     |        |       |       |
|---------------------|--------|-------|-------|
| Mg (mg)             | -0.484 | 351.0 | 72.0  |
| Flavan-3-ol (mg)    | -0.415 | 148.2 | 168.7 |
| Flavones (mg)       | -0.616 | 12.6  | 5.60  |
| Flavonols (mg)      | -0.467 | 44.1  | 32.8  |
| Flavanones (mg)     | -0.250 | 40.7  | 32.2  |
| Anthocyanidins (mg) | -0.131 | 44.0  | 37.2  |
| Isoflavonoids (mg)  | -0.593 | 2.40  | 8.07  |
| Onion (g)           | -0.301 | 10.6  | 8.55  |

---

<sup>1</sup> Retinol Equivalents: retinol + 1/6  $\beta$ -carotene + 1/12  $\alpha$ -carotene.

**Supplementary Table 4.** Food groups included in the dietary inflammation score calculations, and inflammatory effect scores, reported by Byrd et al (12).

| <b>Food groups</b>                         | <b>DIS scores</b> |
|--------------------------------------------|-------------------|
| Leafy greens and cruciferous vegetables    | -0.14             |
| Tomatoes                                   | -0.78             |
| Apples and berries                         | -0.65             |
| Deep yellow or orange vegetables and fruit | -0.57             |
| Other fruits and real fruit juices         | -0.16             |
| Other vegetables                           | -0.16             |
| Legumes                                    | -0.04             |
| Fish                                       | -0.08             |
| Poultry                                    | -0.45             |
| Red and organ meats                        | 0.02              |
| Processed meats                            | 0.68              |
| Added sugars                               | 0.56              |
| High-fat dairy                             | -0.14             |
| Low-fat dairy                              | -0.12             |
| Coffee and tea                             | -0.25             |
| Nuts                                       | -0.44             |
| Other fats                                 | 0.31              |
| Refined grains and starchy vegetables      | 0.72              |
| Supplement score                           | -0.80             |

\*Food items included in each food group have been previously described by Byrd et al.
